# Supplementary material for: Cluster-based comparison of the peptide mass fingerprint obtained by MALDI-TOF mass spectrometry. A case study: long-term stability of rituximab
Source: Royal Society of Chemistry journal article supplement (doi:10.1039/c4an01806k), 2014-12-24
Supplement: c4an01806k1.pdf [file c4an01806k1.pdf]

# Cluster-based comparison of peptide mass fingerprints obtained by MALDI-TOF mass spectrometry. Case study: long-term stability of rituximab

*Pablo J. Villacorta<sup>1</sup>, Antonio Salmerón-García<sup>2</sup>, David A. Pelta<sup>1</sup>, José Cabeza<sup>2</sup>,*

*Antonio Lario<sup>5</sup>, Natalia Navas<sup>2,✉</sup>*

(1) CITIC-UGR, Department of Computer Science and Artificial Intelligence, University of Granada, Avda. de Andalucía, 38 E-18071 Granada, Spain.

(2) UGC Intercentro Interniveles Farmacia Granada, “San Cecilio Hospital”, Biomedical Research Institute ibs.GRANADA. Hospitales Universitarios de Granada, E-18012 Granada, Spain.

(3) CSIC (Consejo Superior Investigaciones Científicas), ProteomicUnit, Parasitology and Biomedicine Institute “López Neira”, Parque Tecnológico Ciencias de la Salud, Avda. del Conocimiento, s/n. 18100 Armilla, Granada, 18005 Spain.

(4) Department of Analytical Chemistry, Science Faculty, Biomedical Research Institute ibis.GRANADA, University of Granada, Campus Fuentenueva s/n, E-18071 Granada, Spain.

✉Corresponding author: E-mail [natalia@ugr.es](mailto:natalia@ugr.es), Phone +34 958243388, Fax. +34 958243328

## ***Supplementary Information***

## Supplementary Figure 1:

### Rituximab

#### ► Light chain :

|            |            |            |            |
|------------|------------|------------|------------|
| QIVLSQSPA  | LSASPGEKVT | MTCRASSSVS | YIHWFQQKPG |
| SSPKPWYAT  | SNLASGVPVR | FSGSGSGTSY | SLTISRVEAE |
| DAATYYCQQW | TSNPPTFGGG | TKLEIKRTVA | APSVFIFPPS |
| DEQLKSGTAS | VVCLLNNFYP | REAKVQWKVD | NALQSGNSQE |
| SVTEQDSKDS | TYSLSSTLTL | SKADYEKHKV | YACEVTHQGL |
| SSPVTKSFNR | GEC;       |            |            |

#### ► Heavy chain:

|                   |                    |                    |                   |
|-------------------|--------------------|--------------------|-------------------|
| <b>QVQLQQPGAE</b> | <b>LVKPGASVKM</b>  | <b>SCKASGYTFT</b>  | <b>SYNMHWVKQT</b> |
| <b>PGRGLEWIGA</b> | <b>IYPGNGDTSY</b>  | <b>NQKFKGKATL</b>  | <b>TADKSSSTAY</b> |
| <b>MQLSSLTSED</b> | <b>SAVYYCAR ST</b> | <b>YGGDWYFNV</b>   | <b>WGAGTTVTVS</b> |
| AASTKGPSVF        | PLAPSSKSTS         | GGTAALGCLV         | DYFPEPVTV         |
| SWNSGALTSG        | VHTFPA VLQS        | SGLYSLSSV          | TVPSSSLGTQ        |
| TYICNVNHKP        | SNTKVDKKA          | PKSCDKTHTC         | PPCPAPELLG        |
| GPSVFLFPPK        | PKDTLMISRT         | PEVTCVVVDV         | SHEDPEVKFN        |
| WYVDGVEVHN        | AKTKPREEQY         | <b>N</b> STYRVVSVL | TVLHQDWLNG        |
| KEYKCKVSNK        | ALPAPIEKTI         | SKAKGQPREP         | QVYTLPPSRD        |
| ELTKNQVSLT        | CLVKGFYPSD         | IAVEWESNGQ         | PENNYKTTTP        |
| VLDSGDGFF L       | YSKLTVDKSR         | WQQGNVFSCS         | VMHEALHNHY        |
| TQKSLSLSPG        | K                  |                    |                   |

Amino acid sequences of light and heavy chains of rituximab obtained from references [26-28]. Murine variable domains indicated in red and blue color; complementary determining regions indicated in blue letters. The N<sub>301</sub> glycosylation site is indicated in green.

## Supplementary Table 1:

**Table 1.** Theoretical rituximab trypsin enzymatic digestion. Amino acid sequences of light and heavy chains taken from references [26-28]

| <i>Sequence position</i> | <i>Missed cleavage</i> | <i>Theoretical mass<sup>1</sup></i> | <i>Sequence<sup>2</sup></i>                |
|--------------------------|------------------------|-------------------------------------|--------------------------------------------|
| [331-338]                | 0                      | 838,50                              | <i>k.ALPAPIEK.t</i>                        |
| [61-76]                  | 0                      | 1606,77                             | <i>R.FSGSGSGTYSYSLTISR.v</i>               |
| [279-292]                | 0                      | 1677,80                             | <i>k.FNWWYVDGVEVHNAK.t</i>                 |
| [126-141]                | 0                      | 1740,87                             | <i>k.SGTASVVCLLNNFYPR.e</i>                |
| [24-38]                  | 0                      | 1791,81                             | <i>k.ASGYTFTSYNMHWVK.q</i>                 |
| [44-63]                  | 0                      | 2183,04                             | <i>r.GLEWIGAIYPGNGDTSYNQK.f</i>            |
| [306-324]                | 1                      | 2228,20                             | <i>r.VVSVLTVLHQDWLNGKEYK.c</i>             |
| [145-168]                | 1                      | 2677,27                             | <i>k.VQWKVDNALQSGNSQESVTEQDSK.d</i>        |
| [306-321]                | 0                      | 1808,00                             | <i>r.VVSVLTVLHQDWLNGK.e</i>                |
| [260-278]                | 0                      | 2082,00                             | <i>r.TPEVTCVVVDVSHEDPEVK.f</i>             |
| [108-125]                | 0                      | 1946,07                             | <i>r.TVAAPSVFIFPPSDEQLK.s</i>              |
| [126-137]                | 0                      | 1186,64                             | <i>k.GPSVFPLAPSSK.s</i>                    |
| [190-206]                | 0                      | 1818,90                             | <i>k.VYACEVTHQGLSSPVTK.s</i>               |
| [75-98]                  | 0                      | 2620,15                             | <i>k.SSSTAYMQLSSLTSEDSAVYYCAR.s</i>        |
| [107-125]                | 1                      | 2102,12                             | <i>k.RTVAAPSVFIFPPSDEQLK.s</i>             |
| [253-259]                | 0                      | 835,43                              | <i>k.DTLMISR.t</i>                         |
| [99-125]                 | 0                      | 2889,33                             | <i>r.STYYGGDWYFNWVWAGTTVTVSAASTK.g</i>     |
| [68-98]                  | 1                      | 3320,52                             | <i>k.ATLTADKSSSTAYMQLSSLTSEDSAVYYCAR.s</i> |
| [39-43]                  | 0                      | 558,29                              | <i>k.QTPGR.g</i>                           |
| [39-63]                  | 1                      | 2722,32                             | <i>k.QTPGRGLEWIGAIYPGNGDTSYNQK.f</i>       |
| [349-364]                | 1                      | 1872,97                             | <i>r.EPQVYTLPPSRDELTK.n</i>                |
| [293-305]                | 1                      | 1671,80                             | <i>k.TKPREEQYNSTYR.v</i>                   |
| [145-148]                | 0                      | 560,31                              | <i>k.VQWK.v</i>                            |
| [188-206]                | 1                      | 2084,05                             | <i>k.HKVYACEVTHQGLSSPVTK.s</i>             |
| [44-65]                  | 1                      | 2458,20                             | <i>r.GLEWIGAIYPGNGDTSYNQKFK.g</i>          |
| [414-418]                | 0                      | 575,33                              | <i>k.LTVDK.s</i>                           |
| [327-338]                | 1                      | 1266,74                             | <i>k.VSNKALPAPIEK.t</i>                    |
| [1-24]                   | 1                      | 2516,32                             | <i>.QIVLSQSPAILSASPGEKVTMTCR.a</i>         |
| [207-213]                | 1                      | 812,33                              | <i>k.SFNRGEC.</i>                          |
| [421-443]                | 0                      | 2744,24                             | <i>r.WQQGNVFCSCVMHEALHNHYTQK.s</i>         |
| [207-210]                | 0                      | 523,26                              | <i>k.SFNR.g</i>                            |
| [343-348]                | 1                      | 656,38                              | <i>k.AKGQPR.e</i>                          |
| [19-24]                  | 0                      | 710,33                              | <i>k.VTMTCR.a</i>                          |
| [397-413]                | 0                      | 1873,92                             | <i>k.TTPPVLDSDGSFFLYSK.l</i>               |
| [218-222]                | 1                      | 600,37                              | <i>k.KVEPK.s</i>                           |
| [183-189]                | 1                      | 890,43                              | <i>k.ADYEKHK.v</i>                         |

|           |   |         |                                              |
|-----------|---|---------|----------------------------------------------|
| [66-74]   | 1 | 904,50  | <i>k.GKATLTADK.s</i>                         |
| [331-342] | 1 | 1267,76 | <i>k.ALPAPIEKTISK.a</i>                      |
| [360-364] | 0 | 605,31  | <i>r.DELTK.n</i>                             |
| [339-344] | 1 | 647,40  | <i>k.TISKAK.g</i>                            |
| [68-74]   | 0 | 719,39  | <i>k.ATLTADK.s</i>                           |
| [444-451] | 0 | 788,45  | <i>k.SLSLSPGK.</i>                           |
| [349-359] | 0 | 1286,67 | <i>r.EPQVYTLPPSR.d</i>                       |
| [149-168] | 0 | 2135,96 | <i>k.VDNALQSGNSQESVTEQDSK.d</i>              |
| [24-43]   | 1 | 2331,09 | <i>k.ASGYFTSYNMHWKQTPGR.g</i>                |
| [375-396] | 0 | 2544,13 | <i>k.GFYPSDIAVEWESNGQPENNYK.t</i>            |
| [293-296] | 0 | 501,31  | <i>k.TKPR.e</i>                              |
| [103-106] | 0 | 502,32  | <i>k.LEIK.r</i>                              |
| [183-187] | 0 | 625,28  | <i>k.ADYEK.h</i>                             |
| [103-107] | 1 | 658,42  | <i>k.LEIKR.t</i>                             |
| [322-326] | 1 | 670,32  | <i>k.EYKCK.v</i>                             |
| [325-330] | 1 | 678,36  | <i>k.CKVSNK.a</i>                            |
| [414-420] | 1 | 818,47  | <i>k.LTVDKSR.w</i>                           |
| [142-148] | 1 | 888,49  | <i>r.EAKVQWK.v</i>                           |
| [219-226] | 1 | 905,43  | <i>k.VEPKSCDK.t</i>                          |
| [365-374] | 0 | 1104,60 | <i>k.NQVSLTCLVK.g</i>                        |
| [297-305] | 0 | 1189,51 | <i>r.EEQYNSTYR.v</i>                         |
| [138-151] | 0 | 1264,65 | <i>k.STSGGTAALGCLVK.d</i>                    |
| [169-182] | 0 | 1502,75 | <i>k.DSTYLSSTLTLSK.a</i>                     |
| [360-374] | 1 | 1690,90 | <i>r.DELTKNQVSLTCLVK.g</i>                   |
| [345-359] | 1 | 1724,90 | <i>k.GQPREPQVYTLPPSR.d</i>                   |
| [1-18]    | 0 | 1825,00 | <i>.QIVLSQSPAILSASPGEK.v</i>                 |
| [1-19]    | 0 | 1977,11 | <i>.QVQLQQPGAELVKPGASVK.m</i>                |
| [126-144] | 1 | 2069,04 | <i>k.SGTASVVCLLNNFYPREAK.v</i>               |
| [169-187] | 1 | 2109,02 | <i>k.DSTYLSSTLTLSKADYEK.h</i>                |
| [279-296] | 1 | 2160,09 | <i>k.FNWWYVDGVEVHNAKTKPR.e</i>               |
| [20-38]   | 1 | 2240,99 | <i>k.MSCKASGYFTSYNMHWVK.q</i>                |
| [190-210] | 1 | 2323,14 | <i>k.VYACEVTHQGLSSPVTKSFNR.g</i>             |
| [1-23]    | 1 | 2426,28 | <i>.QVQLQQPGAELVKPGASVKMSCK.a</i>            |
| [397-418] | 1 | 2430,24 | <i>k.TTPPVLDSDGSFFLYSKLTVDK.s</i>            |
| [126-151] | 1 | 2432,28 | <i>k.GPSVFPLAPSSKSTSGGTAALGCLVK.d</i>        |
| [227-252] | 0 | 2730,41 | <i>k.THTCPPCPAPELLGGPSVFLFPPKPK.d</i>        |
| [77-102]  | 0 | 2821,24 | <i>r.VEAEDAATYYCQQWTSNPPTFGGGTK.l</i>        |
| [253-278] | 1 | 2898,42 | <i>k.DTLMISRTPEVTCVVVDVSHEDPEVK.f</i>        |
| [297-321] | 1 | 2978,50 | <i>r.EEQYNSTYRVSVLTVLHQDWLNGK.e</i>          |
| [419-443] | 1 | 2987,37 | <i>k.SRWQQGNVFSCSVMHEALHNHYTQK.s</i>         |
| [223-252] | 1 | 3163,57 | <i>k.SCDKTHCPPCPAPELLGGPSVFLFPPKPK.d</i>     |
| [77-106]  | 1 | 3304,54 | <i>r.VEAEDAATYYCQQWTSNPPTFGGGTKLEIK.r</i>    |
| [421-451] | 1 | 3513,67 | <i>r.WQQGNVFSCSVMHEALHNHYTQKSLSPGK.</i>      |
| [227-259] | 1 | 3546,83 | <i>k.THTCPPCPAPELLGGPSVFLFPPKPKDTLMISR.t</i> |

|           |   |         |                                                                                                  |
|-----------|---|---------|--------------------------------------------------------------------------------------------------|
| [149-182] | 1 | 3619,70 | <i>k.VDNALQSGNSQESVTEQDSKDYSLSSSTLTLTK.a</i>                                                     |
| [365-396] | 1 | 3629,72 | <i>k.NQVSLTCLVKGFYPSDIAVEWESNGQPENNYK.t</i>                                                      |
| [108-141] | 1 | 3667,88 | <i>r.TVAAPSVFIFPPSDEQLKSGTASVVCLLNNFYPR.e</i>                                                    |
| [260-292] | 1 | 3740,79 | <i>r.TPEVTCVVVDVSHEDPEVKFNWYVDGVEVHNAK.t</i>                                                     |
| [25-60]   | 0 | 3933,00 | <i>r.ASSVS<del>Y</del>IHW<del>F</del>Q<del>Q</del>KPGSSPKPW<del>I</del>YATSNLASGVPVR.f</i>       |
| [99-137]  | 1 | 4056,96 | <i>r.<del>STYYGGDWYFNW</del>GAGTTVTVSAASTKGPSVFPLAPSSK.s</i>                                     |
| [375-413] | 1 | 4399,03 | <i>k.GFYPSDIAVEWESNGQPENNYK<del>TT</del>PPVLDSG<del>S</del>FFLYSK.l</i>                          |
| [61-102]  | 1 | 4408,99 | <i>r.FSGSGSGT<del>S</del>YSLTISRVEAEDAATYYC<del>Q</del>QWTSNPPTFGGGTK.l</i>                      |
| [19-60]   | 1 | 4624,32 | <i>k.VTMTCRASSVS<del>Y</del>IHW<del>F</del>Q<del>Q</del>KPGSSPKPW<del>I</del>YATSNLASGVPVR.f</i> |

(1) Calculated in positive mode.

(2) Sequences indicated in blue are from peptides which were detected at least once throughout the long-term study.

(3) Amino acids sequences indicated in red are from the complementary determining regions.
